# Supplementary material for: Hippocampal volumes predict risk of dementia with Lewy bodies in mild cognitive impairment
Source: PubMed Central journal article supplement — Neurology. 2016 Nov 29;87(22):2317–23. doi: 10.1212/WNL.0000000000003371 (PMC5135023; doi:10.1212/wnl.0000000000003371), 2016-11-29
Supplement: supp_WNL.0000000000003371_Supplemental_e-tables.pdf [file supp_WNL.0000000000003371_Supplemental_e-tables.pdf]

**Supplemental table e-1:** Multivariable model including hippocampal volume and MCI subtype. Using HVa cut-off (upper 10<sup>th</sup> percentile) for hippocampal preservation or atrophy derived from the AD progressor MCIs. Subdistribution hazard ratio is reported for DLB progression accounting for competing AD progression

| Outcome | Predictors                          | Sub-distribution HR (95% CI) | p-value |
|---------|-------------------------------------|------------------------------|---------|
| Model 1 | Preserved aHV versus atrophic aHV   | 7.61 (2.28-25.45)            | 0.0010  |
|         | aMCI-MD versus aMCI –SD             | 14.51 (3.06-68.80)           | 0.0008  |
|         | naMCI versus aMCI –SD               | 8.07 (1.76-36.89)            | 0.0071  |
| Model 2 | Preserved aHV versus atrophic aHV   | 5.62 (2.33-13.55)            | 0.0001  |
|         | aMCI-MD plus naMCI* versus aMCI –SD | 10.74 (2.65-43.53)           | 0.0007  |

\* MCI with impairments in non amnesic cognitive domains

Abbreviations: HVa: total intracranial volume adjusted hippocampal volume; aMCI-MD: amnesic mild cognitive impairment – multiple domain; naMCI: non-amnesic mild cognitive impairment; aMCI-SD: amnesic mild cognitive impairment – single domain

**Supplemental table e-2:** Multivariable model including hippocampal volume and clinical features of DLB. Sub-distribution hazard ratio is reported for DLB progression accounting for competing AD progression

| Predictors                        | Sub-distribution HR<br>(95% CI) | p-value |
|-----------------------------------|---------------------------------|---------|
| Preserved HVa versus atrophic HVa | 2.76 (1.01-7.54)                | 0.048   |
| Visual Hallucinations             | 2.32 (0.55-9.78)                | 0.250   |
| Fluctuations                      | 1.02 (0.22-4.48)                | 0.980   |
| Parkinsonism                      | 8.58 (1.62-45.42)               | 0.011   |
| RBD                               | 2.36 (1.04-5.35)                | 0.039   |

Abbreviations: HVa: total intracranial volume adjusted hippocampal volume
